# Supplementary material
Source: Research Square preprint supplement (doi:10.21203/rs.3.rs-8618094/v1)
Supplement: Supplementary file 1 [file abeebf6e9f27760d7a5d0b43.xlsx]

## Sheet: Sheet1
Number	CA1	CA2	CA3	CA4	CA5	SFS1	SFS2	SFS3	SFS4	SFS5	SFS6	SFS7	TS1	TS2	TS3	TS4	PEU1	PEU2	PEU3	PEU4	PEU5	PEU6	PEU7	PU1	PU2	PU3	PU4	PU5	PU6	ITU1	ITU2	ITU3	ITU4
1	3	3	3	3	3	2	3	3	2	1	1	3	3	5	5	5	3	4	3	3	3	3	3	3	3	2	2	3	3	2	2	3	3
2	4	3	3	4	3	4	4	4	4	4	4	5	3	3	3	4	4	3	5	4	4	5	4	5	4	4	4	2	4	2	2	3	3
3	4	2	2	3	3	2	4	5	4	1	1	4	3	4	3	3	4	4	4	3	4	4	4	3	4	4	3	4	3	2	3	3	3
4	4	4	4	4	4	4	4	4	4	3	4	4	5	5	5	5	5	5	5	5	4	4	4	4	4	4	4	4	4	4	4	4	5
5	4	3	4	4	3	2	5	4	2	3	4	5	4	3	5	5	5	5	5	4	4	5	5	4	5	3	5	4	4	3	4	3	3
6	4	4	4	3	4	3	4	5	3	4	2	4	4	4	4	4	4	4	4	3	3	3	4	4	4	4	4	4	4	4	4	5	4
7	4	4	4	3	4	4	5	5	5	5	4	5	5	5	4	4	5	4	4	4	3	4	4	4	4	3	4	4	4	3	3	4	5
8	4	4	4	3	4	5	5	5	4	4	4	5	5	5	5	5	5	5	5	4	4	4	4	4	4	4	4	4	4	4	4	4	4
9	4	4	3	3	4	4	4	4	3	3	4	4	4	4	4	4	4	4	4	4	4	4	4	4	4	4	4	4	4	3	4	4	4
10	4	3	3	4	4	3	5	4	2	2	3	5	4	4	4	2	4	5	4	4	3	4	3	5	5	4	5	3	4	2	1	2	3
11	4	3	4	4	4	1	4	4	4	4	3	4	5	5	5	5	4	5	4	3	4	4	4	4	4	4	4	4	4	4	4	4	4
12	4	3	4	2	4	4	5	5	4	5	2	4	5	4	4	5	4	4	4	4	5	5	5	3	5	4	5	2	4	3	3	4	4
13	3	1	3	1	1	1	5	5	1	5	3	5	3	3	3	3	5	1	1	1	1	1	1	1	1	1	1	1	1	1	1	1	1
14	3	4	4	3	4	3	4	4	3	4	3	3	4	3	4	4	4	3	4	3	4	3	4	4	3	4	3	4	3	4	4	4	4
15	4	3	3	3	4	4	4	4	4	4	3	4	3	3	3	3	4	4	3	4	4	4	4	4	4	4	4	4	4	3	4	4	4
16	4	4	4	4	4	4	4	4	1	2	3	4	4	4	3	3	4	4	4	4	4	4	4	4	4	4	4	4	4	4	4	4	4
17	3	3	2	2	2	1	4	4	1	2	2	3	4	4	3	4	4	4	3	3	3	3	3	3	4	3	2	3	3	1	1	1	2
18	3	3	3	3	3	2	3	2	1	1	3	3	3	3	3	3	4	4	3	3	4	3	4	4	4	4	4	3	4	3	3	4	4
19	4	3	3	3	4	4	4	4	4	3	3	5	4	4	4	3	4	5	4	5	5	5	5	5	4	4	4	3	4	4	5	4	4
20	4	3	3	4	4	3	4	4	3	3	3	5	4	5	5	5	4	4	4	4	4	4	4	4	3	4	3	3	4	3	2	4	3
21	4	5	4	4	4	5	5	5	4	5	5	5	5	3	3	5	5	5	5	5	4	4	1	4	5	4	4	3	4	4	4	5	5
22	4	2	1	2	3	3	2	2	1	2	2	3	4	2	4	4	3	3	4	4	4	4	1	3	3	3	2	2	3	2	1	4	3
23	3	3	3	2	3	1	4	4	1	4	4	4	5	5	3	5	4	4	4	4	4	4	4	4	4	4	2	2	3	3	2	2	2
24	4	4	4	3	4	4	5	4	4	3	2	4	4	4	4	5	3	4	4	4	5	5	4	3	4	4	4	3	4	3	4	4	4
25	4	3	4	3	4	1	4	5	3	4	3	5	4	5	4	5	4	4	5	4	4	3	4	5	4	5	4	4	5	3	3	4	4
26	4	3	3	3	4	4	5	4	5	4	3	4	5	4	5	4	4	4	5	4	5	4	5	5	5	5	5	4	4	5	4	5	5
27	4	4	4	3	4	4	4	4	4	4	3	4	4	3	4	4	4	3	4	4	4	4	4	4	4	4	4	4	4	3	4	4	4
28	3	2	2	2	3	3	4	4	2	2	4	4	3	4	4	4	3	3	3	3	3	4	3	3	4	3	3	3	3	2	2	3	3
29	3	3	3	3	3	3	3	3	4	4	4	4	4	3	4	4	3	3	3	3	4	4	3	4	3	3	3	4	4	4	3	3	4
30	3	4	3	3	4	4	4	4	4	4	4	4	4	3	4	4	4	4	4	4	4	4	5	5	4	5	4	4	5	3	4	4	4
31	4	4	4	3	4	3	4	4	5	5	4	5	2	2	3	3	4	5	5	5	5	3	3	4	4	4	4	3	5	5	5	5	5
32	4	2	3	4	3	4	5	4	4	2	4	4	5	4	4	5	4	4	4	5	5	4	4	4	4	5	5	5	5	4	4	4	5
33	4	4	3	3	4	2	4	4	2	2	2	4	5	5	5	5	5	5	5	4	3	3	3	3	3	4	3	4	4	2	3	3	3
34	4	4	4	4	4	4	4	4	4	4	4	4	4	4	4	4	5	5	5	4	5	4	5	4	4	5	4	4	4	3	4	4	4
35	3	2	3	3	4	2	4	3	1	2	4	4	3	3	3	3	4	4	3	3	4	4	4	3	4	4	3	4	4	4	3	4	3
36	3	4	3	3	3	3	3	3	4	4	3	4	4	4	3	4	4	4	4	4	4	4	4	4	3	4	3	4	4	3	3	3	3
37	4	4	4	3	4	4	4	4	2	3	3	3	2	2	3	3	3	4	4	4	4	4	4	4	4	4	4	4	4	3	3	4	4
38	4	3	3	3	3	4	4	5	4	4	3	4	4	4	4	4	5	4	4	4	4	3	3	4	4	4	4	4	3	4	4	4	4
39	4	4	4	3	3	4	3	4	1	1	2	3	3	2	4	2	4	4	3	3	3	3	4	2	2	4	3	5	3	2	4	2	1
40	3	4	3	4	4	4	5	5	5	5	5	5	5	5	5	5	4	4	4	5	5	5	4	4	4	5	4	4	4	5	5	5	4
41	4	4	4	3	4	3	4	4	3	4	4	4	4	4	4	4	5	4	4	4	4	4	4	4	4	4	4	4	4	4	4	4	4
42	4	3	4	3	3	4	5	5	4	4	4	4	4	4	4	4	4	4	4	4	4	3	3	4	4	5	4	5	4	4	4	4	4
43	4	4	4	3	4	5	5	5	5	4	5	5	4	5	4	5	5	5	5	5	5	4	4	5	5	5	5	5	5	3	3	4	4
44	4	4	4	4	4	4	4	4	4	4	3	3	4	4	4	4	4	3	4	4	4	4	4	3	4	4	4	3	4	3	4	4	4
45	3	3	3	3	3	3	5	4	4	3	3	4	4	4	5	5	5	5	4	4	4	4	4	4	4	4	4	4	4	4	4	4	4
46	4	4	3	4	4	4	4	4	4	4	3	4	4	4	4	4	4	4	4	3	4	4	4	4	4	4	4	4	4	3	4	4	4
47	4	3	3	4	3	3	3	4	3	3	4	4	4	3	4	3	4	4	3	3	4	5	5	3	4	4	4	4	3	3	4	3	4
48	5	4	4	4	4	2	3	5	4	2	5	5	3	3	3	5	5	5	5	4	4	3	3	4	3	4	4	4	4	4	3	3	4
49	3	2	3	3	2	3	3	4	3	2	3	4	3	3	3	4	4	4	4	4	4	4	4	4	4	4	4	3	4	3	3	3	3
50	5	3	3	4	4	2	4	4	3	3	5	5	4	4	5	5	4	5	4	5	5	5	5	5	5	5	5	5	5	5	4	5	5
51	5	4	4	5	5	5	4	4	3	4	5	5	5	5	5	4	4	4	5	4	5	5	4	5	5	5	4	4	4	3	4	4	3
52	4	4	3	4	4	2	3	3	2	2	3	3	3	4	4	5	3	3	4	4	3	4	4	3	3	4	4	3	3	4	4	3	3
53	5	4	5	5	5	5	3	4	5	5	5	5	4	4	3	3	5	5	5	5	3	4	5	4	4	4	5	5	5	3	4	4	5
54	3	3	3	3	3	3	5	5	3	4	4	4	4	4	4	4	4	4	4	5	5	4	4	4	4	5	5	5	5	4	4	4	5
55	4	3	3	4	3	4	4	4	4	3	3	4	4	4	4	4	4	4	4	4	4	4	4	4	4	4	4	4	4	4	4	4	4
56	3	3	3	4	2	3	4	4	4	3	4	5	4	4	4	4	5	5	4	4	5	4	4	4	5	5	4	4	4	3	4	4	4
57	4	4	4	3	4	4	4	4	3	3	3	4	4	4	4	4	4	4	4	4	4	4	4	4	4	4	4	4	4	3	4	4	4
58	5	4	4	5	5	3	4	4	3	5	5	4	5	4	5	5	4	5	5	5	4	4	4	5	4	4	3	5	4	5	5	3	4
59	4	3	2	2	4	2	5	5	1	1	5	4	3	4	4	5	4	5	5	5	3	3	1	5	4	4	4	3	4	3	4	4	4
60	4	4	3	3	4	4	4	3	3	3	4	4	4	4	4	4	3	3	3	3	4	4	3	3	4	4	3	4	3	2	2	3	3
61	3	4	3	4	4	4	4	4	3	4	4	4	5	4	5	5	4	4	4	4	4	4	3	4	4	4	4	3	4	3	4	3	3
62	4	4	4	3	4	3	4	4	4	4	3	4	4	4	4	4	4	4	4	4	4	4	3	4	4	4	4	4	4	4	4	4	4
63	4	3	5	4	4	5	5	5	4	4	2	3	3	4	3	5	4	4	4	4	3	4	4	4	4	5	4	4	4	5	4	4	5
64	4	4	3	2	3	4	4	4	3	4	2	4	4	4	4	4	5	4	4	5	5	4	4	4	4	4	4	5	4	3	3	4	4
65	3	4	3	3	5	3	5	5	5	5	3	5	5	5	4	5	5	5	5	5	5	5	5	5	3	4	4	4	5	5	5	5	5
66	4	2	4	2	3	5	5	4	3	4	4	5	4	3	4	4	4	5	5	4	4	4	3	4	5	5	4	5	5	4	4	5	5
67	3	3	3	4	4	2	4	3	3	3	4	4	3	4	4	5	4	4	4	4	4	4	3	5	3	5	4	4	4	3	3	3	3
68	4	4	2	3	3	4	5	5	1	2	3	4	3	4	4	4	4	4	4	4	4	4	4	4	4	4	4	4	4	3	3	4	4
69	2	2	2	1	2	1	2	1	1	4	2	2	2	2	2	3	4	2	3	4	3	3	3	3	3	3	2	2	2	1	1	2	1
70	3	2	2	1	3	2	3	2	1	2	1	3	4	4	3	3	3	2	2	2	3	2	2	3	2	3	2	3	3	1	1	2	1
71	4	3	3	3	4	4	5	5	3	3	3	5	5	5	5	4	5	5	4	3	5	5	4	4	5	5	3	4	4	2	3	3	3
72	3	3	3	3	3	1	1	4	1	1	1	4	4	3	4	4	4	4	4	4	3	3	4	2	2	4	4	3	3	4	3	3	1
73	3	3	3	4	3	4	5	5	4	4	4	5	5	5	5	5	4	4	3	2	2	2	3	3	3	3	3	4	4	4	4	4	3
74	4	4	4	3	4	3	5	4	4	4	3	3	4	4	4	4	4	4	4	4	5	4	5	5	5	5	5	5	5	5	5	5	5
75	4	5	5	5	5	5	5	5	5	5	5	5	5	5	5	5	5	5	5	5	5	5	4	4	4	5	5	5	4	4	4	5	5
76	4	4	3	4	4	3	4	4	4	4	4	4	5	5	5	5	4	4	4	4	4	4	4	4	4	4	4	4	4	4	4	4	4
77	4	2	3	1	3	3	4	4	3	4	2	4	3	2	2	3	3	4	3	3	4	4	4	3	4	4	4	4	3	2	2	3	2
78	4	4	4	4	4	5	5	5	3	4	4	4	4	4	4	4	4	4	4	4	4	4	4	4	4	4	4	4	4	4	4	4	4
79	3	3	3	3	4	4	5	5	5	3	1	5	5	3	3	5	5	5	5	4	4	4	4	5	5	5	3	4	3	3	3	3	4
80	4	4	3	3	5	3	4	4	3	2	4	4	5	5	3	4	4	3	5	4	4	3	3	4	3	3	4	5	4	3	3	3	3
81	3	3	3	4	4	4	5	5	4	3	2	5	4	4	3	4	5	4	4	4	5	4	4	4	4	4	4	3	4	2	3	3	4
82	3	3	3	3	3	3	5	4	4	4	4	5	5	5	5	5	4	4	4	3	4	4	4	4	4	4	3	3	3	3	3	3	3
83	2	5	5	5	5	5	3	5	5	5	5	5	5	1	1	1	5	5	5	5	5	5	5	5	5	4	4	4	4	4	4	5	5
84	4	4	4	4	4	4	4	4	4	4	4	3	4	4	4	4	4	3	3	3	3	3	3	3	3	3	3	3	3	3	3	3	3
85	4	2	4	3	3	2	4	4	1	1	3	5	4	3	3	3	4	4	3	3	3	3	3	3	3	3	3	3	3	3	3	3	3
86	4	4	3	3	3	4	4	4	3	3	3	4	4	4	4	4	4	4	3	3	4	4	4	4	4	4	4	4	4	3	5	5	5
87	5	4	4	4	4	3	4	4	2	3	4	4	4	4	4	4	5	4	4	4	4	4	4	4	4	4	4	4	4	3	4	5	4
88	3	3	3	3	3	3	3	3	2	2	3	3	3	3	3	3	2	2	3	3	3	4	3	2	2	3	2	3	3	2	2	3	3
89	4	4	4	4	4	3	4	4	3	4	4	4	4	4	3	4	4	4	4	4	4	4	4	4	5	4	5	4	4	5	5	5	5
90	3	3	3	3	4	4	4	4	4	4	4	4	2	5	5	5	5	5	5	5	5	5	5	5	5	5	5	5	5	3	3	4	4
91	5	4	4	4	5	3	5	5	2	2	3	5	5	5	4	4	5	5	5	5	5	5	5	4	4	4	4	4	5	5	5	5	5
92	4	3	4	3	3	5	5	5	4	4	5	5	5	5	5	5	5	5	4	5	5	5	5	5	5	5	4	5	5	5	5	5	5
93	3	3	3	3	3	3	3	3	3	3	3	3	3	3	3	3	3	3	3	3	3	3	3	3	3	3	3	3	3	3	3	3	3
94	3	3	3	3	4	3	4	4	1	1	4	5	5	5	5	5	5	5	5	5	5	5	5	5	5	5	5	5	5	2	2	3	3
95	3	2	2	1	3	1	3	2	1	2	3	4	4	3	3	3	4	2	2	2	2	2	2	2	2	2	1	2	2	1	2	3	3
96	1	1	1	1	1	1	2	1	2	1	1	2	5	1	5	5	3	2	3	2	1	3	2	1	2	3	2	1	2	3	2	1	2
97	4	3	4	4	4	4	4	5	4	4	5	5	5	5	5	5	5	5	5	5	5	5	5	5	5	5	5	5	5	5	5	5	5
98	4	3	3	3	4	4	4	4	4	3	4	5	4	3	3	4	4	4	4	4	4	3	4	4	5	3	3	3	4	2	3	3	3
99	4	4	4	4	4	4	4	4	1	4	4	4	3	4	4	4	4	4	4	4	4	4	4	4	4	4	4	4	4	4	4	4	4
100	4	4	4	4	4	4	4	4	4	4	4	4	4	4	4	4	4	4	4	4	4	4	4	4	4	4	4	3	4	4	4	4	4
101	5	5	5	5	5	5	5	5	5	5	5	5	5	5	5	5	5	5	5	5	5	5	5	5	5	5	5	5	5	5	5	5	5
102	3	4	4	4	4	4	4	4	3	4	4	5	5	4	3	3	4	4	3	3	3	3	3	3	3	3	3	2	3	2	3	3	3
103	4	4	4	4	4	4	4	4	4	4	4	4	4	4	4	4	4	4	4	4	4	4	4	4	4	4	4	4	4	4	4	4	4
104	5	5	5	5	5	5	5	5	5	5	5	5	5	5	5	5	5	5	5	5	5	5	5	5	5	5	5	5	5	5	5	5	5
105	4	4	3	4	3	5	5	5	4	4	3	5	5	5	5	5	5	5	5	5	5	5	5	5	5	5	5	5	5	3	4	4	4
106	4	3	3	2	4	2	5	5	3	3	2	4	3	4	2	4	4	4	4	2	4	4	3	3	4	3	2	2	3	1	2	3	2
107	3	2	2	3	2	1	4	4	1	1	2	4	3	3	2	3	4	4	4	3	4	3	3	4	3	4	3	4	4	2	1	2	3
108	4	4	5	4	4	3	4	4	4	4	3	4	4	4	4	4	4	4	4	4	4	4	4	4	4	4	4	4	4	4	4	5	4
109	4	5	5	4	5	5	5	4	4	4	5	5	5	5	5	5	5	5	5	5	5	4	4	5	5	5	4	5	5	5	3	4	4
110	3	2	3	3	2	2	4	4	2	2	3	4	3	4	4	4	4	4	4	3	3	4	3	3	5	5	3	4	3	3	4	3	1
111	4	3	3	3	4	3	4	4	3	4	4	4	4	4	4	4	4	4	4	4	4	4	4	4	4	4	4	3	4	4	4	3	3
112	4	4	5	4	5	4	4	5	5	4	5	5	5	5	5	5	4	4	5	4	5	5	4	4	5	3	5	5	5	4	4	5	5
113	4	4	4	4	4	4	4	4	4	4	4	4	4	4	4	4	5	4	5	4	4	4	4	5	4	4	4	4	4	4	4	5	4
114	3	3	3	3	4	2	4	3	2	2	4	4	4	4	3	3	4	4	3	3	4	4	4	4	3	4	3	4	4	2	2	3	3
115	3	3	3	3	3	3	3	3	4	4	4	4	4	4	4	4	4	4	4	4	4	4	4	4	4	4	4	4	4	4	4	4	4
116	4	3	4	3	4	4	4	4	4	5	4	5	5	5	5	5	5	5	5	5	5	4	3	4	4	4	5	5	5	4	4	5	5
117	4	3	4	3	4	4	4	5	2	3	4	3	3	4	3	2	3	4	3	4	3	3	4	4	4	3	2	2	5	3	4	5	2
118	4	4	4	3	4	4	4	4	4	4	4	4	4	3	4	4	5	4	4	4	5	4	3	5	4	5	4	4	4	3	4	3	4
119	5	5	5	3	5	4	5	5	3	5	5	5	5	5	4	4	5	5	5	5	5	5	5	5	5	5	5	4	5	5	5	5	5
120	4	4	3	3	4	4	5	5	3	4	4	5	4	4	4	4	5	5	5	4	4	4	3	4	4	4	4	5	5	4	4	4	4
121	4	4	4	4	3	4	4	4	4	4	4	5	5	5	4	5	5	5	5	5	5	5	5	5	5	5	5	5	5	5	5	5	4
122	4	3	4	4	4	5	4	4	3	3	3	4	4	4	5	5	4	4	4	3	4	4	4	4	4	4	4	4	4	3	4	4	4
123	5	5	5	3	5	5	5	5	5	5	5	5	5	5	5	5	5	5	5	5	5	5	5	5	5	5	5	5	5	5	5	5	5
124	5	4	5	4	5	3	5	5	3	5	5	5	5	5	5	5	5	5	5	5	5	5	5	5	5	5	5	4	5	3	5	3	5
125	4	3	4	3	4	5	5	5	3	5	2	4	5	5	5	5	4	5	5	4	4	3	3	3	4	4	4	4	4	3	3	3	3
126	4	3	4	4	4	4	4	4	4	3	4	5	5	4	4	5	4	5	5	4	4	4	4	5	5	4	4	4	4	4	4	3	4
127	4	4	3	3	4	4	5	5	5	4	4	5	4	4	5	5	5	5	5	5	5	5	5	5	4	5	4	4	4	3	3	3	4
128	4	3	3	3	3	4	4	4	5	4	4	5	5	5	4	5	4	5	4	5	4	4	4	4	5	4	3	4	4	4	4	4	4
129	5	4	5	5	5	4	4	5	4	4	4	5	5	4	5	4	3	3	4	5	4	3	4	5	4	3	4	5	4	5	4	4	3
130	4	5	3	3	4	1	4	5	1	1	3	5	5	2	3	5	5	5	5	3	4	5	5	5	5	5	5	5	5	4	4	3	4
131	4	4	4	4	4	4	4	4	4	4	4	4	4	4	4	4	4	4	4	4	4	4	4	4	4	4	4	4	4	4	4	4	3
132	4	2	3	3	4	4	3	2	3	2	3	5	5	5	5	5	5	4	3	4	5	3	3	4	4	4	4	4	4	3	3	4	2
133	4	5	5	4	5	3	4	5	3	3	3	4	4	4	4	4	4	4	4	4	5	5	4	4	4	5	4	5	4	5	5	3	3
134	4	4	4	3	4	3	4	4	4	4	3	4	3	4	4	5	4	4	4	4	4	4	4	3	4	4	3	3	3	3	3	4	3
135	4	4	3	4	3	4	4	4	4	4	4	4	4	4	4	4	4	4	4	4	4	4	4	4	4	4	4	4	4	4	4	4	4
136	5	5	5	4	4	2	5	5	3	4	3	5	5	5	5	5	5	5	4	4	4	4	4	4	4	4	4	4	4	2	3	5	4
137	4	3	3	3	4	4	4	5	4	3	4	5	4	3	4	4	5	4	4	4	4	4	4	4	4	5	4	5	5	4	4	4	4
138	3	3	3	3	3	3	3	3	2	3	3	4	3	3	3	3	4	3	3	4	3	3	3	4	3	4	3	3	3	4	3	3	3
139	4	5	5	4	4	4	4	4	3	4	2	4	5	4	4	4	5	5	4	5	5	5	3	4	5	4	4	4	5	3	4	3	3
140	3	3	2	3	2	2	3	3	2	2	2	4	3	3	3	3	4	3	3	3	4	4	4	4	4	4	4	4	4	4	3	2	3
141	3	4	3	3	4	4	5	5	4	5	5	5	5	5	5	5	5	5	4	4	4	4	4	5	5	5	5	5	5	3	4	4	4
142	4	3	4	4	4	3	4	4	4	4	4	4	4	4	4	4	4	5	4	5	4	5	4	4	4	4	4	4	5	5	5	5	5
